# Supplementary material for: A selective fluorescent chemosensor for phosphoserine
Source: Royal Society of Chemistry journal article supplement (doi:10.1039/c3ob41677a), 2013-01-01

## Supporting Information

### “A Selective Fluorescent Chemosensor for Phosphoserine”

Chad M. Cooley, Kenneth S. Hettie, Jessica L. Klockow, Shana Garrison, and Timothy E. Glass\*

*Department of Chemistry, Columbia, MO 65211*

*GlassT@missouri.edu*

| Table of Contents |                    | Page    |
|-------------------|--------------------|---------|
| I.                | Binding Titrations | S2-S9   |
| II.               | Molecular Modeling | S9      |
| III.              | NMR Spectra        | S10-S15 |

## I. Binding Titrations

### Titrations with $Zn^{2+}$

#### Sensor 1

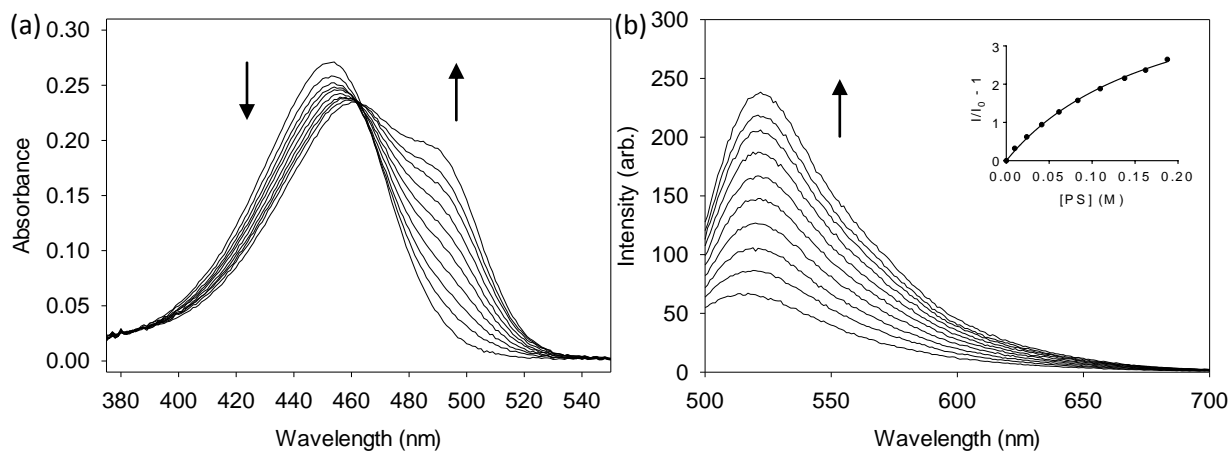

**Figure S1.** (a) UV/Vis and (b) fluorescence titration of sensor 1 (10  $\mu$ M) and zinc acetate (10  $\mu$ M) in 3:97 DMSO/buffer (50 mM HEPES, 100 mM NaCl, pH 7.4) adding aliquots of 500 mM phosphoserine.  $\lambda_{em}$  = 521 nm. Inset is the fit to a binding isotherm.

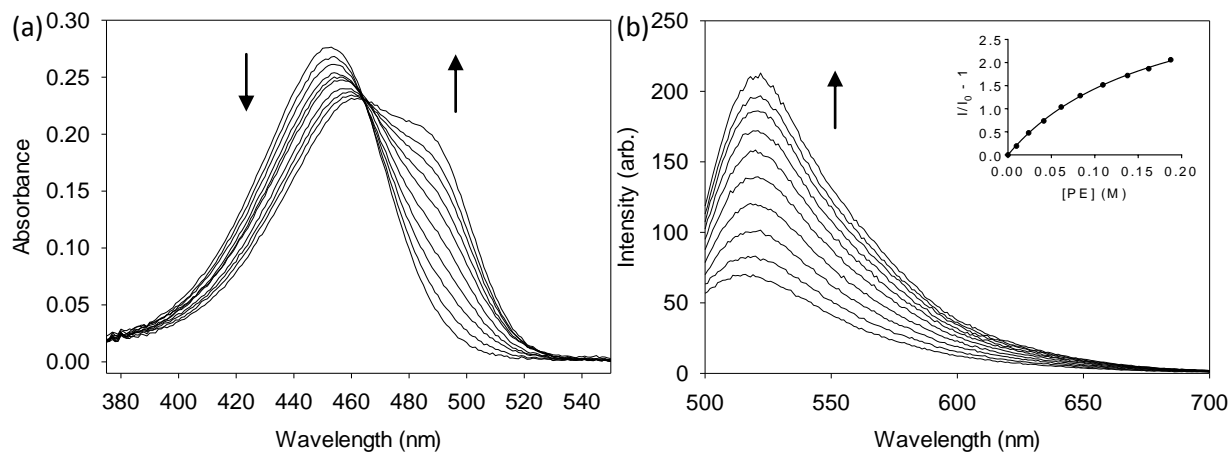

**Figure S2.** (a) UV/Vis and (b) fluorescence titration of sensor 1 (10  $\mu$ M) and zinc acetate (10  $\mu$ M) in 3:97 DMSO/buffer (50 mM HEPES, 100 mM NaCl, pH 7.4) adding aliquots of 500 mM phosphoethanolamine.  $\lambda_{em}$  = 521 nm. Inset is the fit to a binding isotherm.

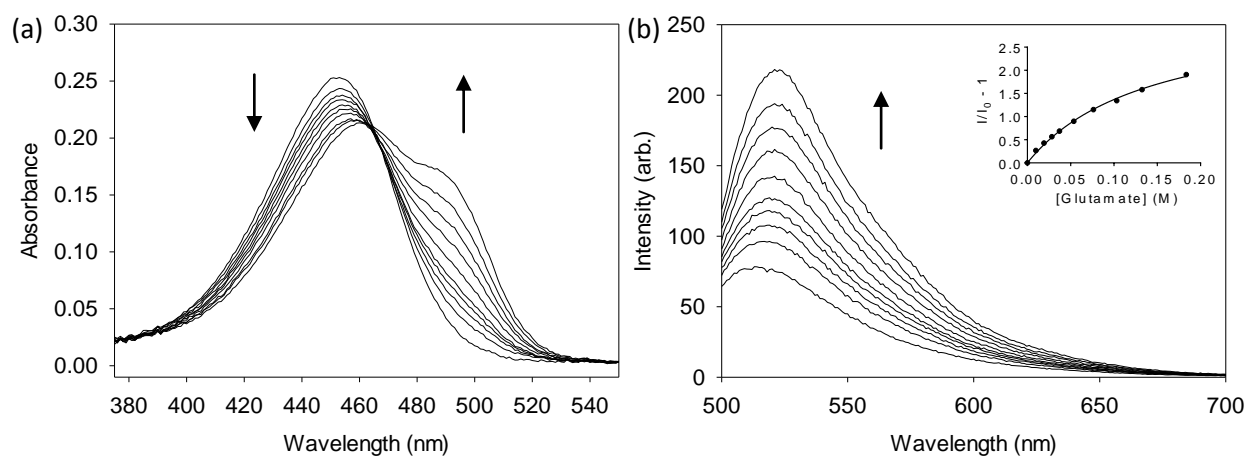

**Figure S3.** (a) UV/Vis and (b) fluorescence titration of sensor **1** (10  $\mu$ M) and zinc acetate (10  $\mu$ M) in 3:97 DMSO/buffer (50 mM HEPES, 100 mM NaCl, pH 7.4) adding aliquots of 500 mM glutamate.  $\lambda_{em}$  = 521 nm. Inset is the fit to a binding isotherm.

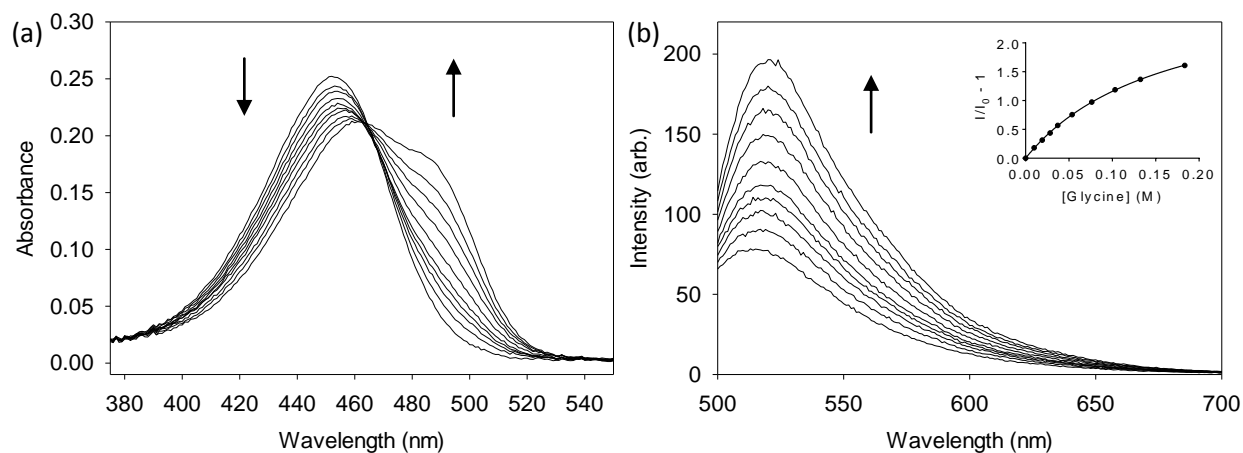

**Figure S4.** (a) UV/Vis and (b) fluorescence titration of sensor **1** (10  $\mu$ M) and zinc acetate (10  $\mu$ M) in 3:97 DMSO/buffer (50 mM HEPES, 100 mM NaCl, pH 7.4) adding aliquots of 500 mM glycine.  $\lambda_{em}$  = 521 nm. Inset is the fit to a binding isotherm.

## Sensor 2

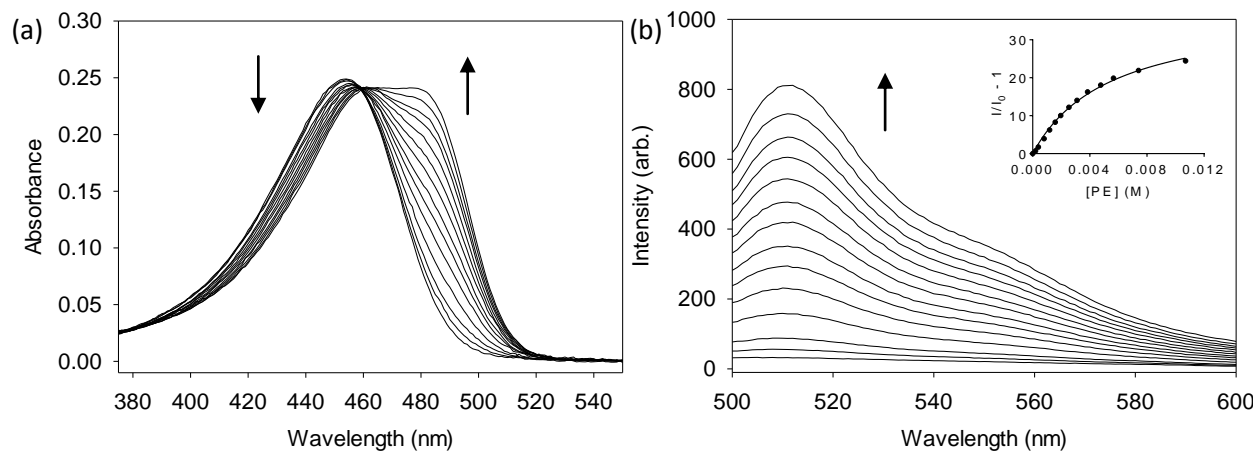

**Figure S5.** (a) UV/Vis and (b) fluorescence titration of sensor **2** (10  $\mu$ M) and zinc acetate (10  $\mu$ M) in buffer (50 mM HEPES, 100 mM NaCl, pH 7.4) adding aliquots of 100 mM phosphoethanolamine.  $\lambda_{em} = 513$  nm. Inset is the fit to a binding isotherm.

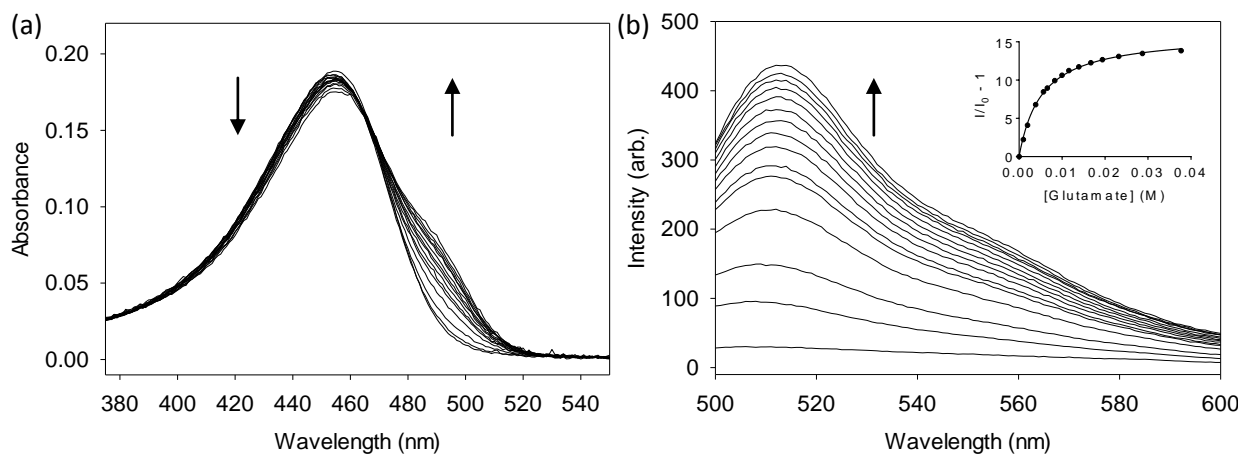

**Figure S6.** (a) UV/Vis and (b) fluorescence titration of sensor **2** (10  $\mu$ M) and zinc acetate (10  $\mu$ M) in buffer (50 mM HEPES, 100 mM NaCl, pH 7.4) adding aliquots of 1 M glutamate.  $\lambda_{em} = 513$  nm. Inset is the fit to a binding isotherm.

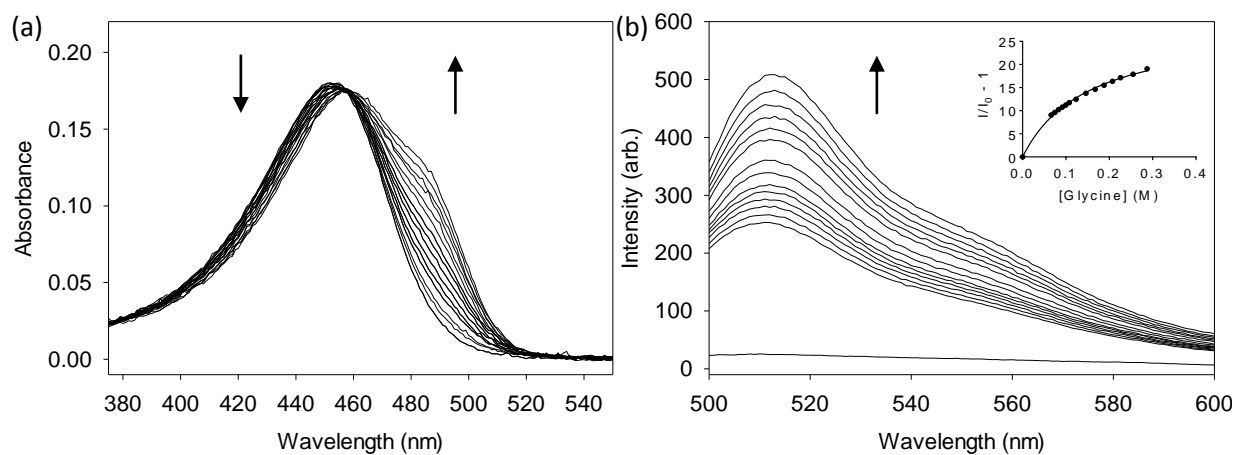

**Figure S7.** (a) UV/Vis and (b) fluorescence titration of sensor **2** (10  $\mu$ M) and zinc acetate (10  $\mu$ M) in buffer (50 mM HEPES, 100 mM NaCl, pH 7.4) adding aliquots of 1 M glycine.  $\lambda_{em}$  = 513 nm. Inset is the fit to a binding isotherm.

### Titration without $Zn^{2+}$

#### Sensor **1**

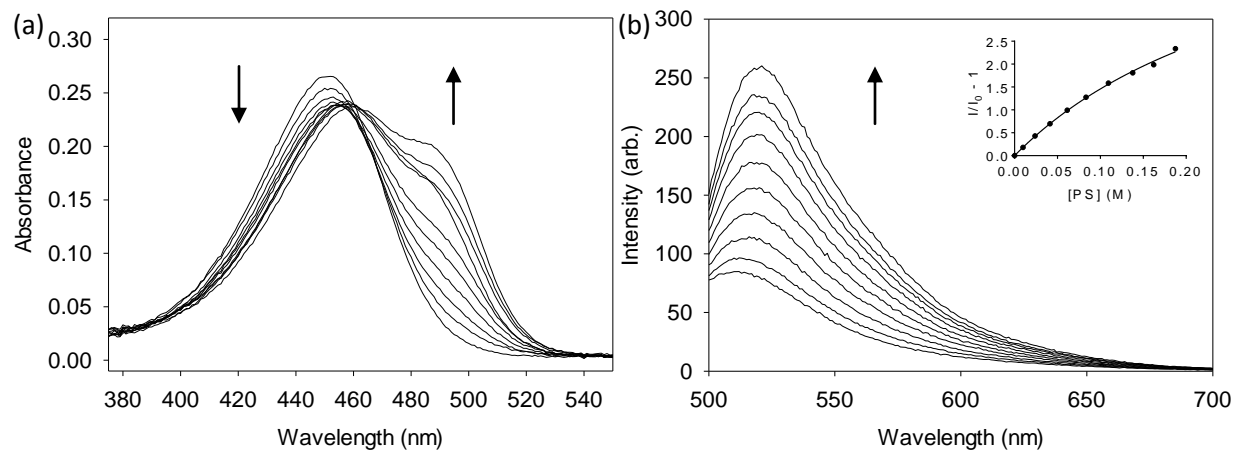

**Figure S8.** (a) UV/Vis and (b) fluorescence titration of sensor **1** (10  $\mu$ M) in 3:97 DMSO/buffer (50 mM HEPES, 100 mM NaCl, pH 7.4) adding aliquots of 500 mM phosphoserine.  $\lambda_{em}$  = 521 nm. Inset is the fit to a binding isotherm.

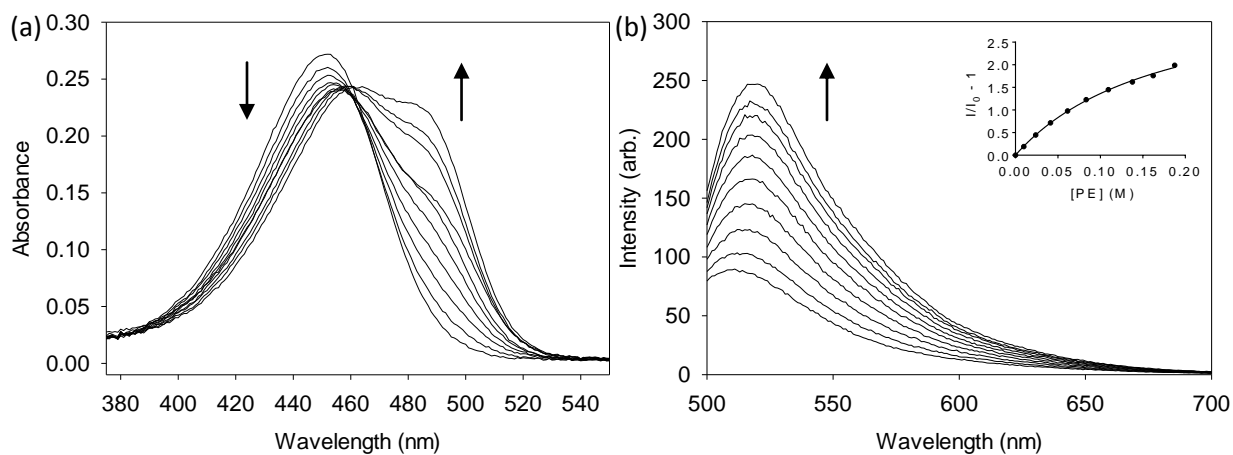

**Figure S9.** (a) UV/Vis and (b) fluorescence titration of sensor **1** (10  $\mu$ M) in 3:97 DMSO/buffer (50 mM HEPES, 100 mM NaCl, pH 7.4) adding aliquots of 500 mM phosphoethanolamine.  $\lambda_{em}$  = 521 nm. Inset is the fit to a binding isotherm.

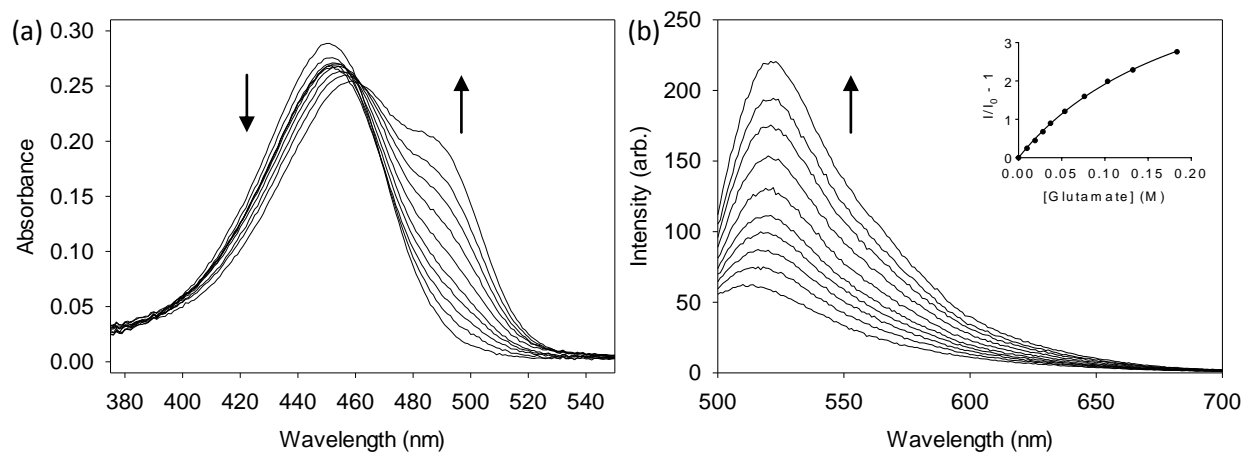

**Figure S10.** (a) UV/Vis and (b) fluorescence titration of sensor **1** (10  $\mu$ M) in 3:97 DMSO/buffer (50 mM HEPES, 100 mM NaCl, pH 7.4) adding aliquots of 500 mM glutamate.  $\lambda_{em}$  = 521 nm. Inset is the fit to a binding isotherm.

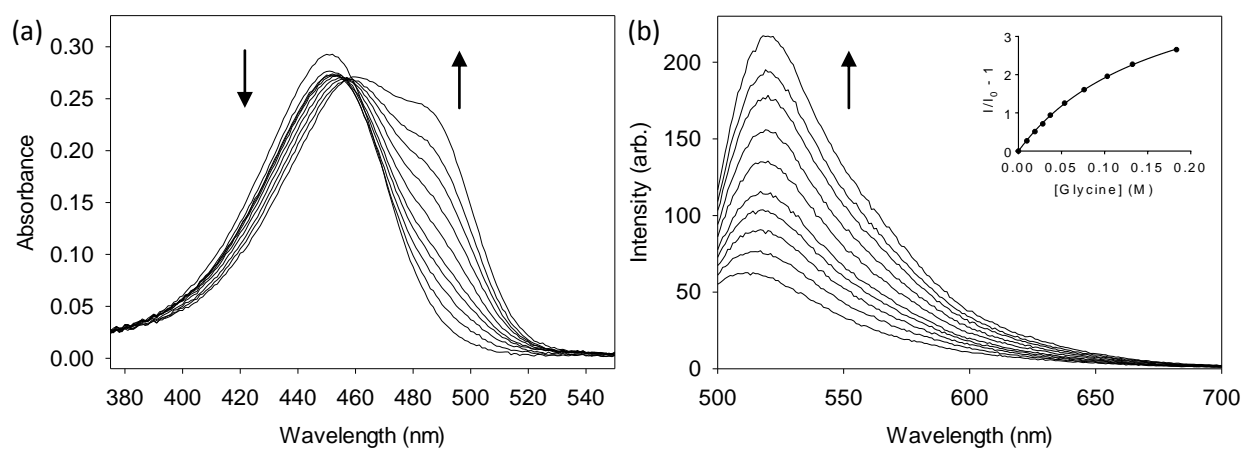

**Figure S11.** (a) UV/Vis and (b) fluorescence titration of sensor **1** (10  $\mu\text{M}$ ) in 3:97 DMSO/buffer (50 mM HEPES, 100 mM NaCl, pH 7.4) adding aliquots of 500 mM glycine.  $\lambda_{\text{em}} = 521$  nm. Inset is the fit to a binding isotherm.

## Sensor 2

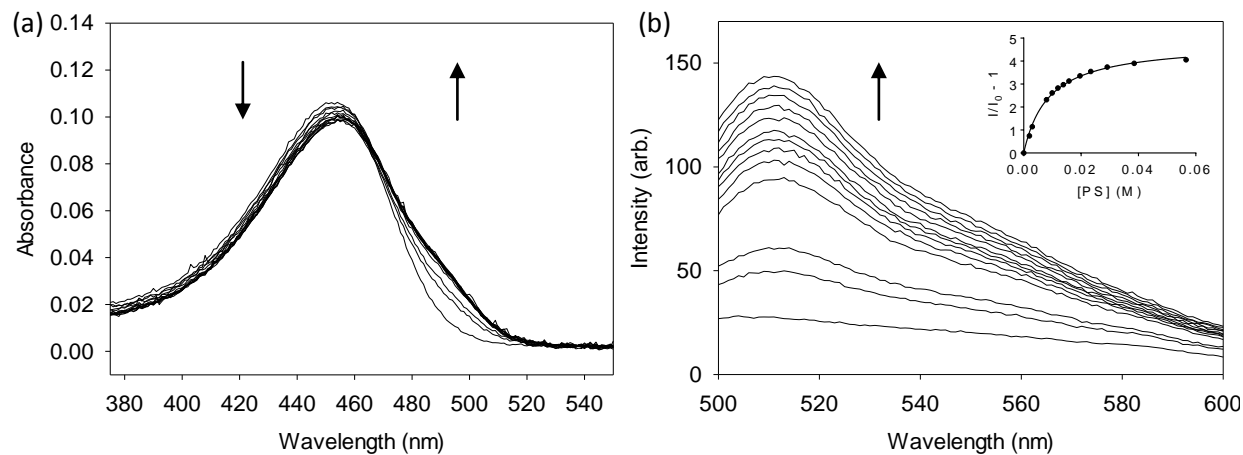

**Figure S12.** (a) UV/Vis and (b) fluorescence titration of sensor **2** (10  $\mu\text{M}$ ) in buffer (50 mM HEPES, 100 mM NaCl, pH 7.4) adding aliquots of 1 M phosphoserine.  $\lambda_{\text{em}} = 513$  nm. Inset is the fit to a binding isotherm.

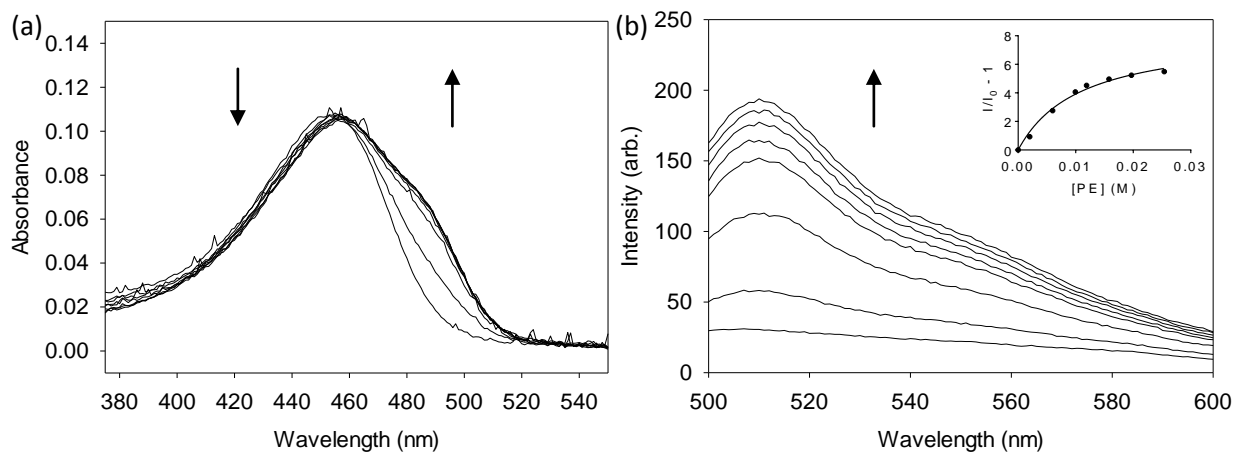

**Figure S13.** (a) UV/Vis and (b) fluorescence titration of sensor **2** (10  $\mu$ M) in buffer (50 mM HEPES, 100 mM NaCl, pH 7.4) adding aliquots of 1 M phosphoethanolamine.  $\lambda_{em}$  = 513 nm. Inset is the fit to a binding isotherm.

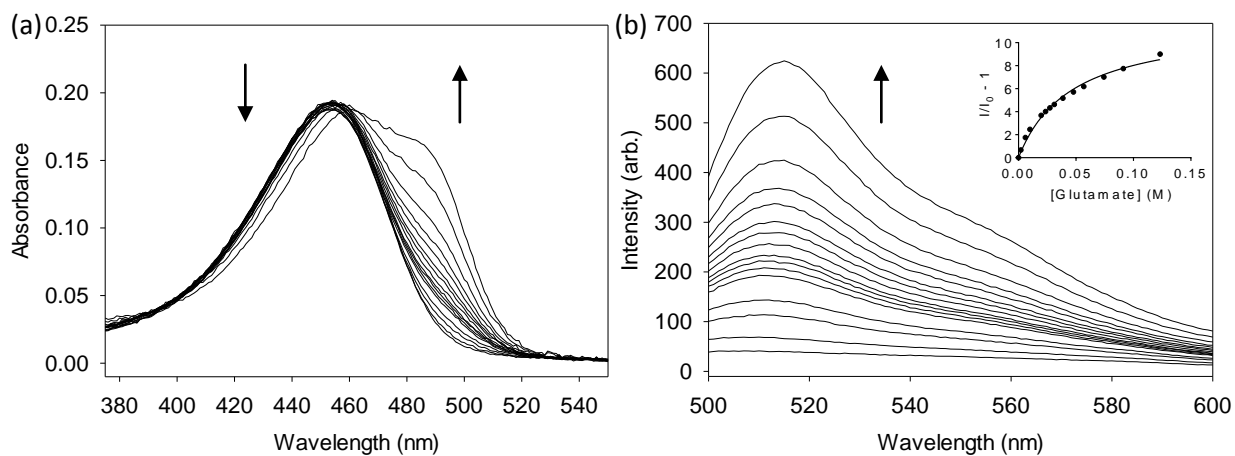

**Figure S14.** (a) UV/Vis and (b) fluorescence titration of sensor **2** (10  $\mu$ M) in buffer (50 mM HEPES, 100 mM NaCl, pH 7.4) adding aliquots of 1 M glutamate.  $\lambda_{em}$  = 513 nm. Inset is the fit to a binding isotherm.



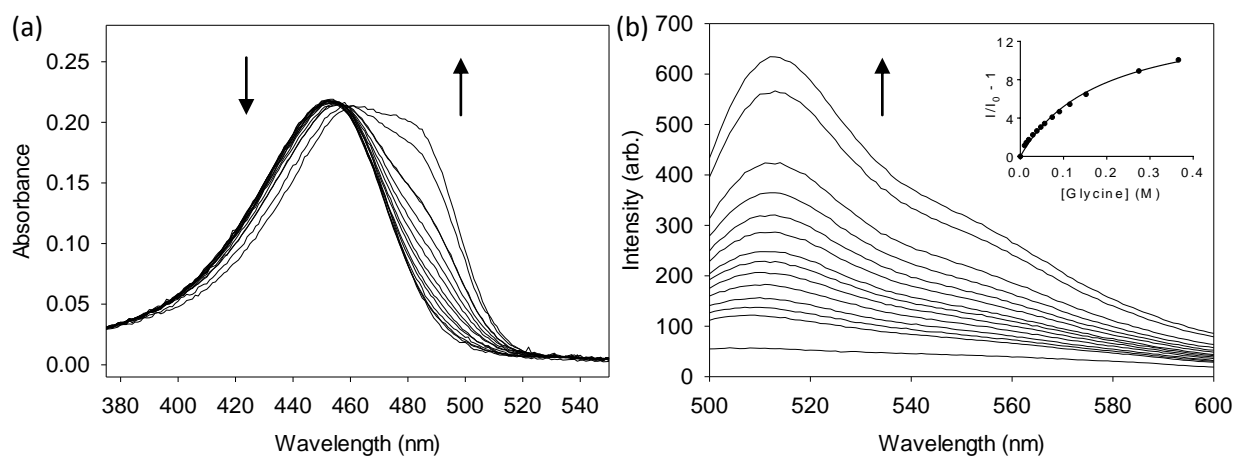

**Figure S15.** (a) UV/Vis and (b) fluorescence titration of sensor **2** (10 μM) in buffer (50 mM HEPES, 100 mM NaCl, pH 7.4) adding aliquots of 1 M glycine.  $\lambda_{em}$  = 513 nm. Inset is the fit to a binding isotherm.

## II. Molecular Modeling

Models were constructed using Spartan '10.

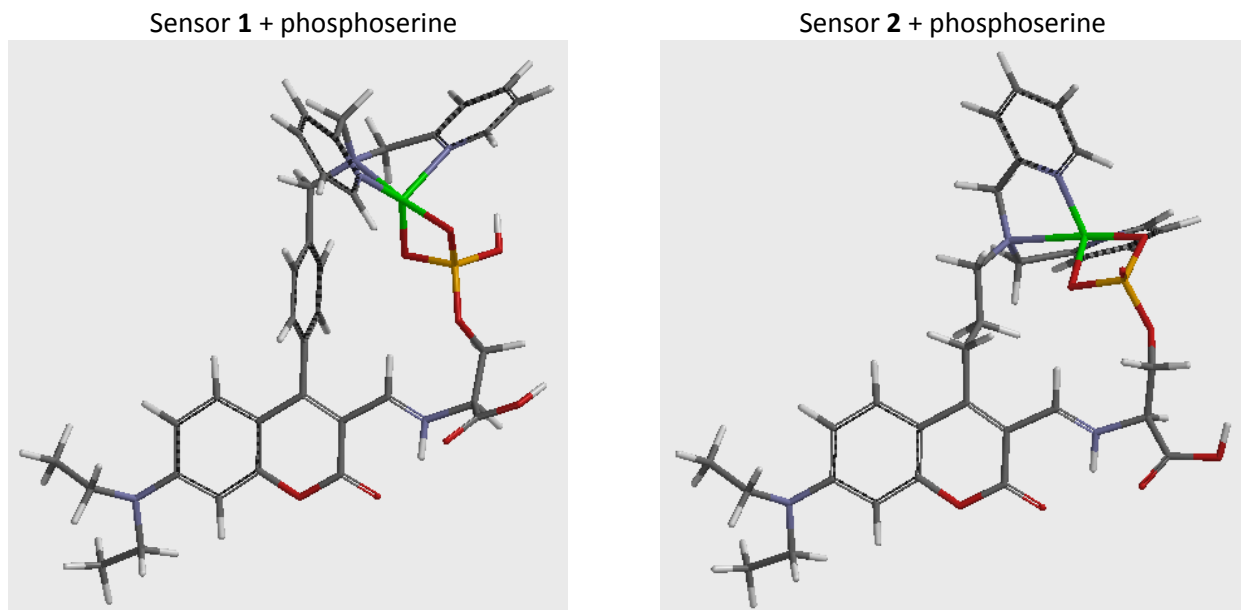

### III. NMR Spectra

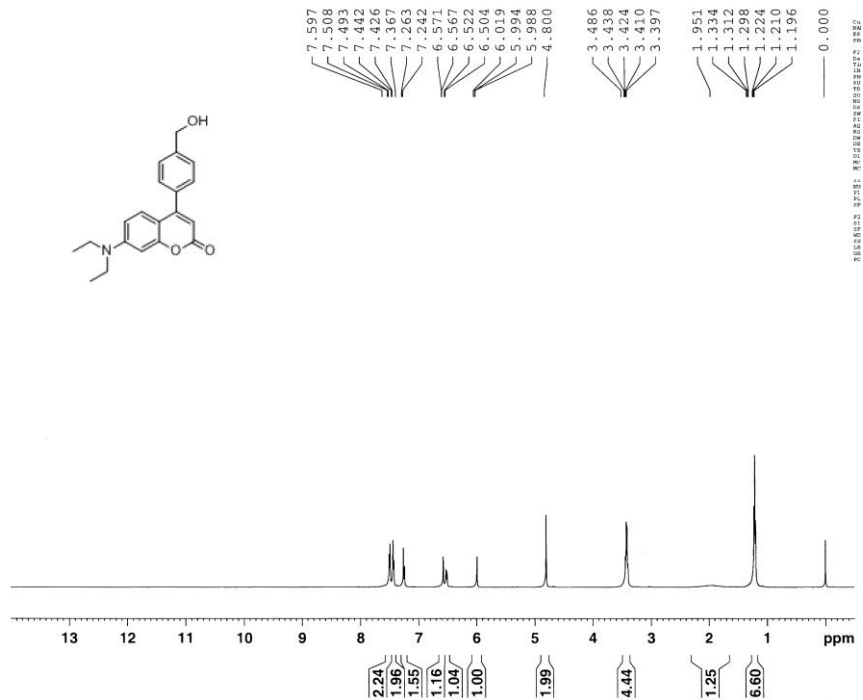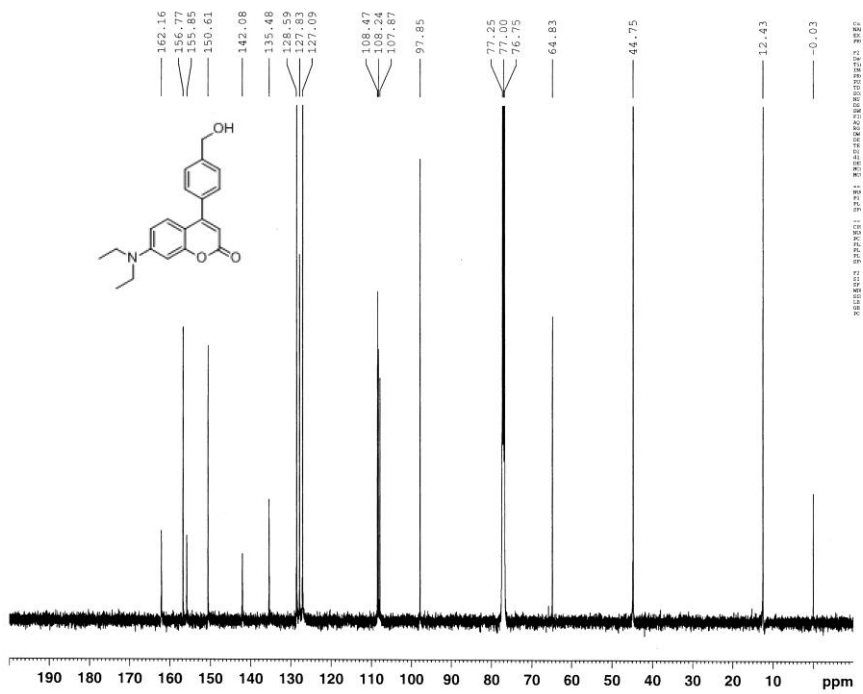

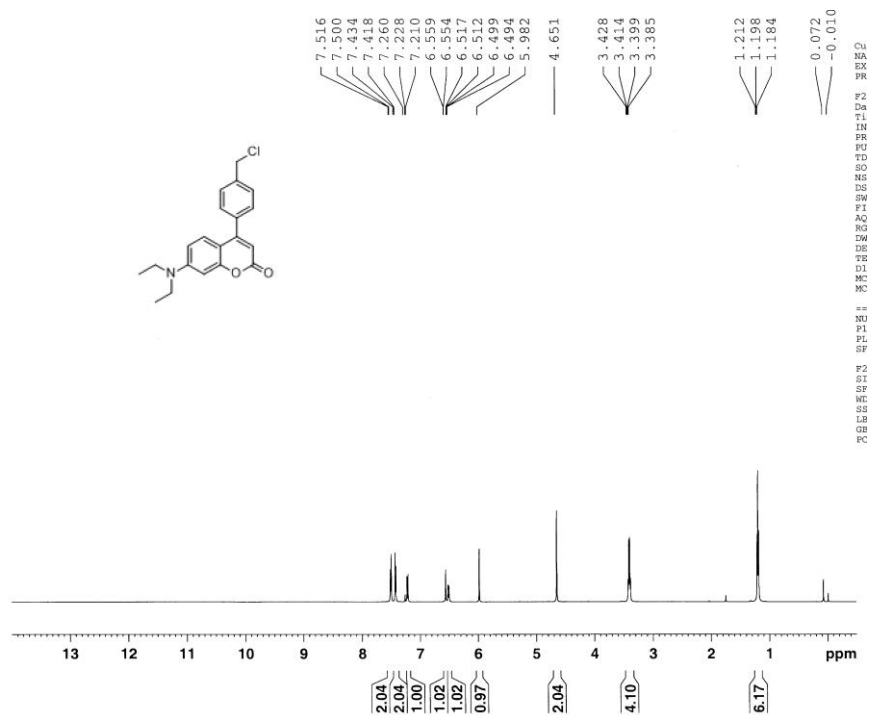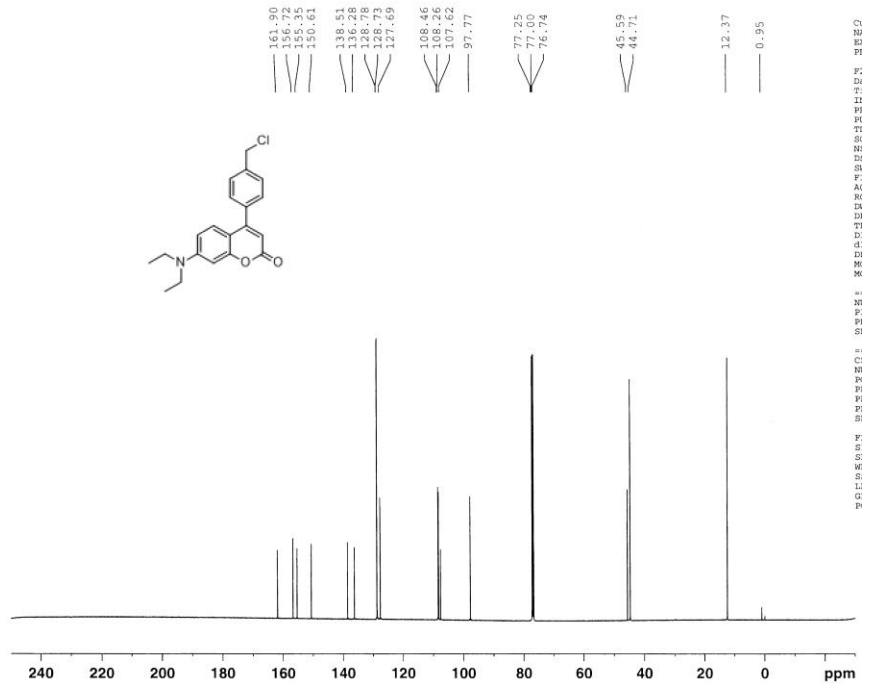

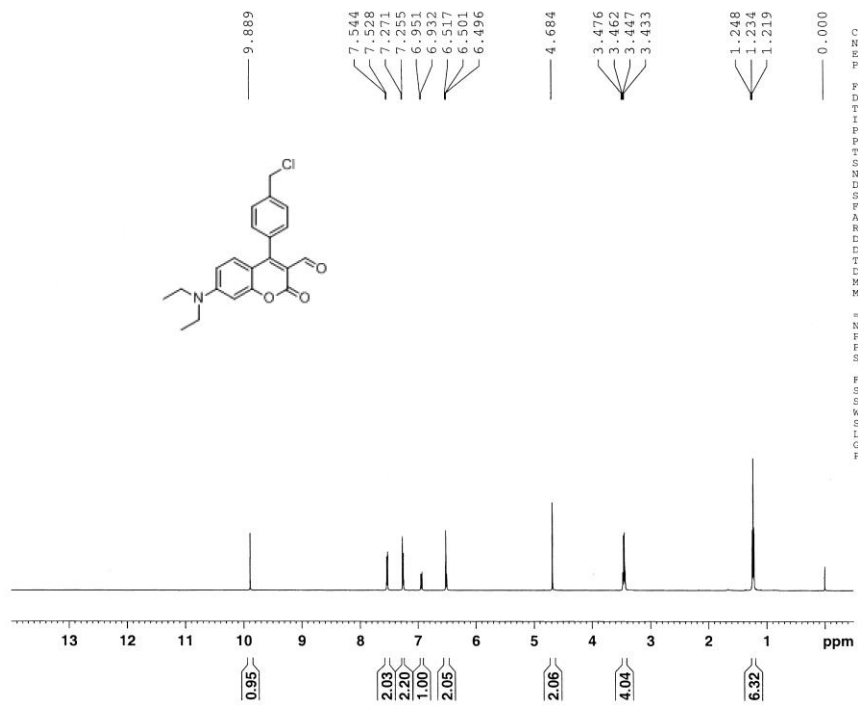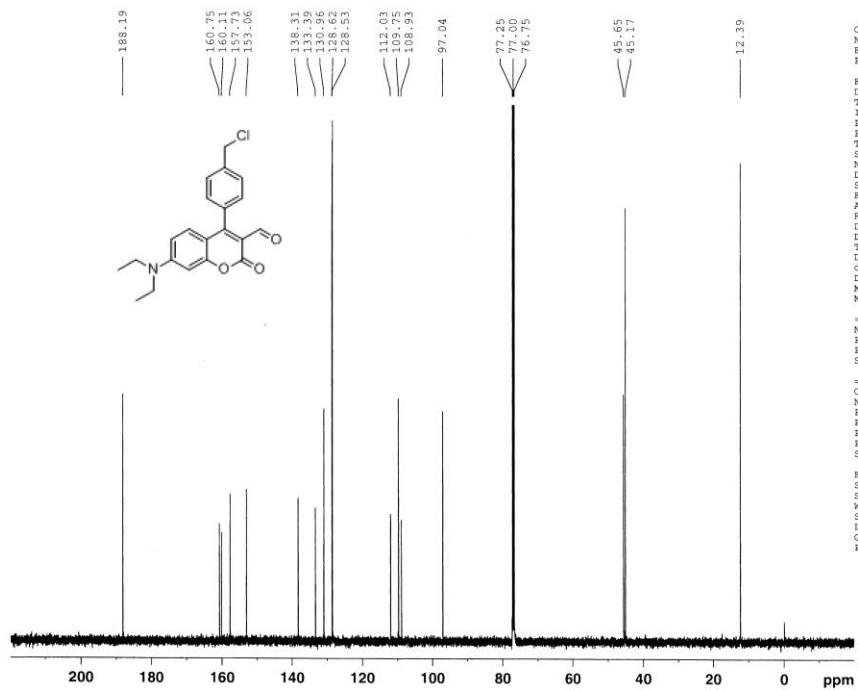

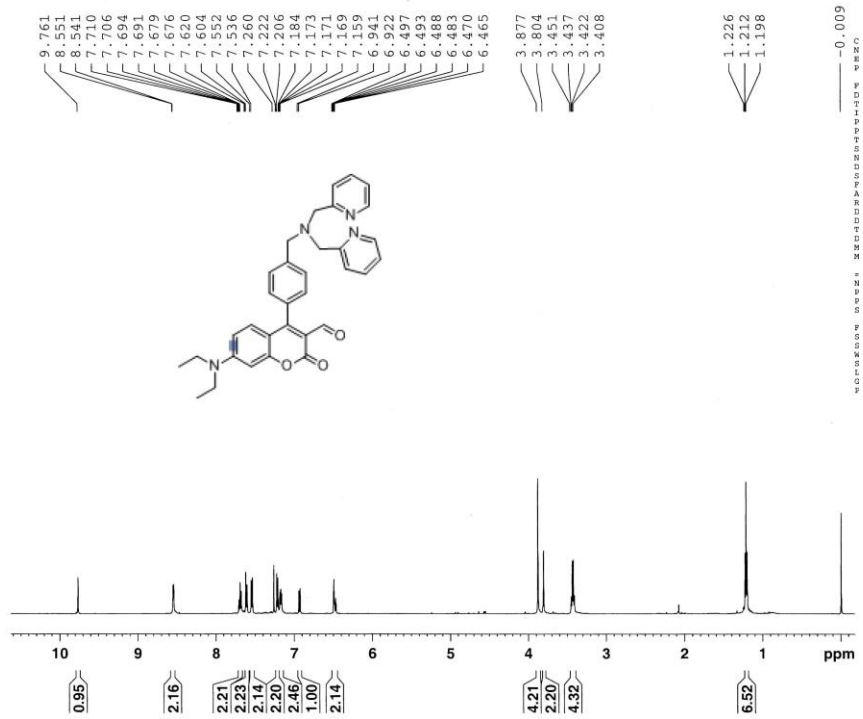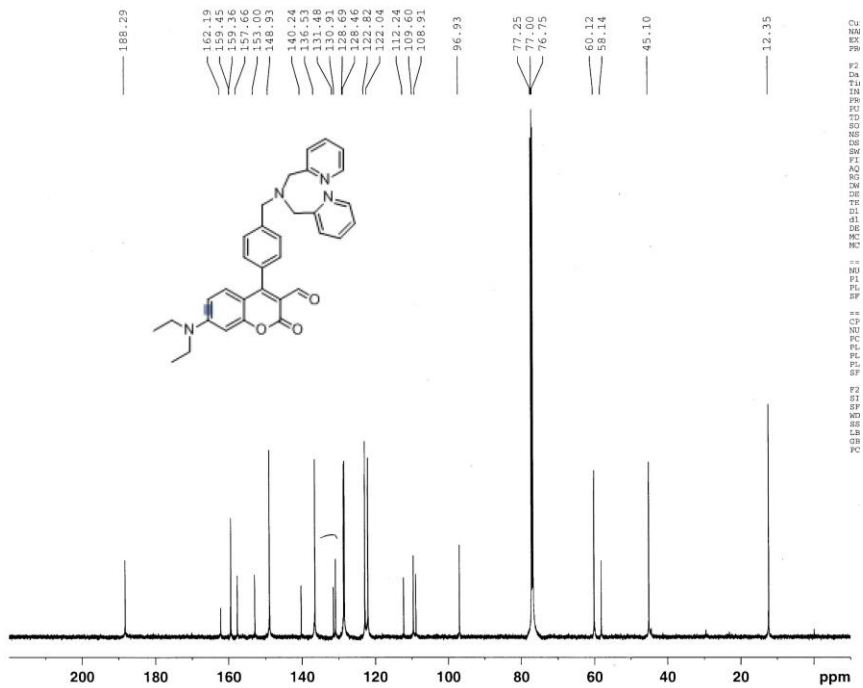

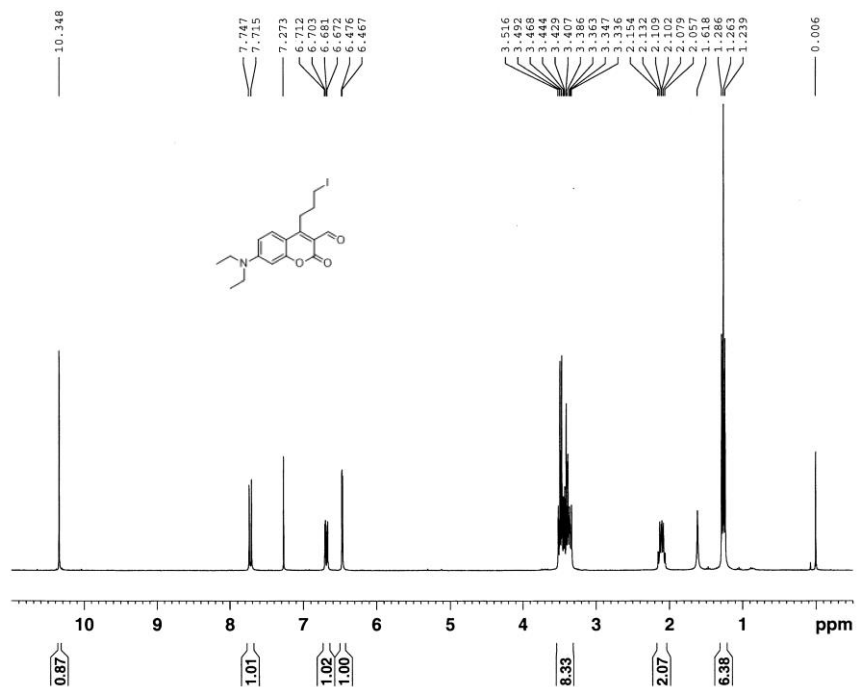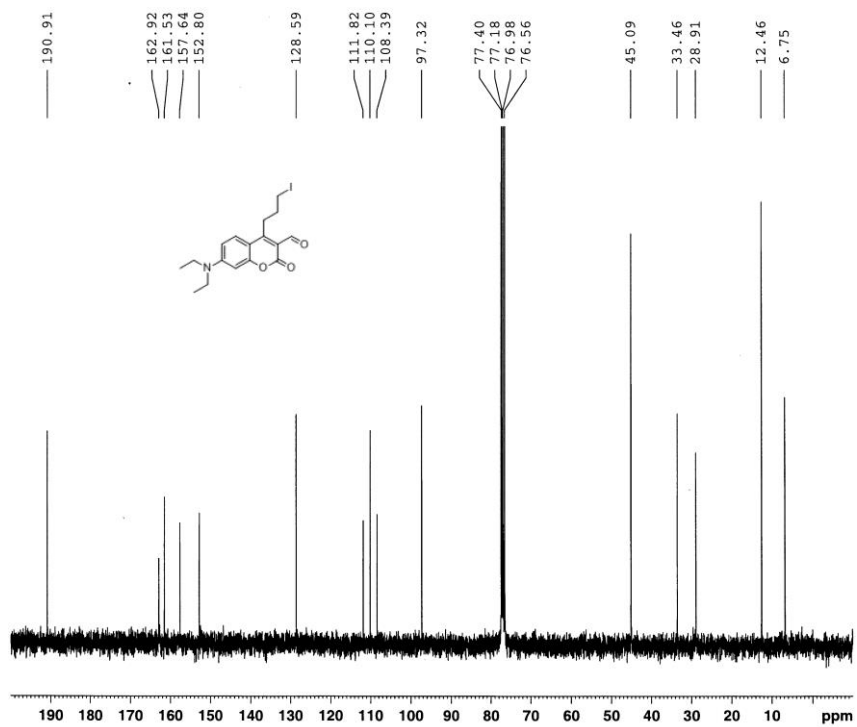

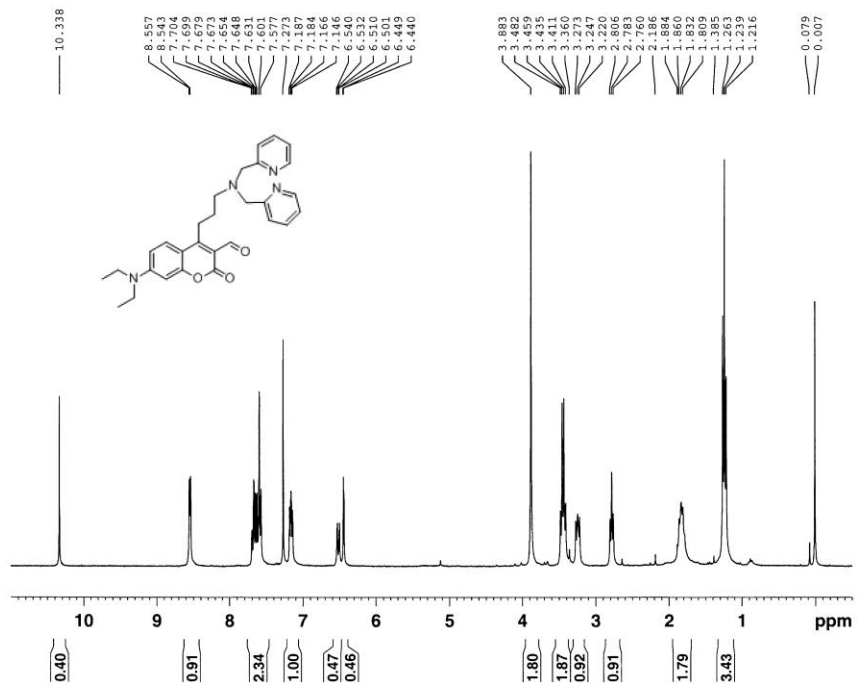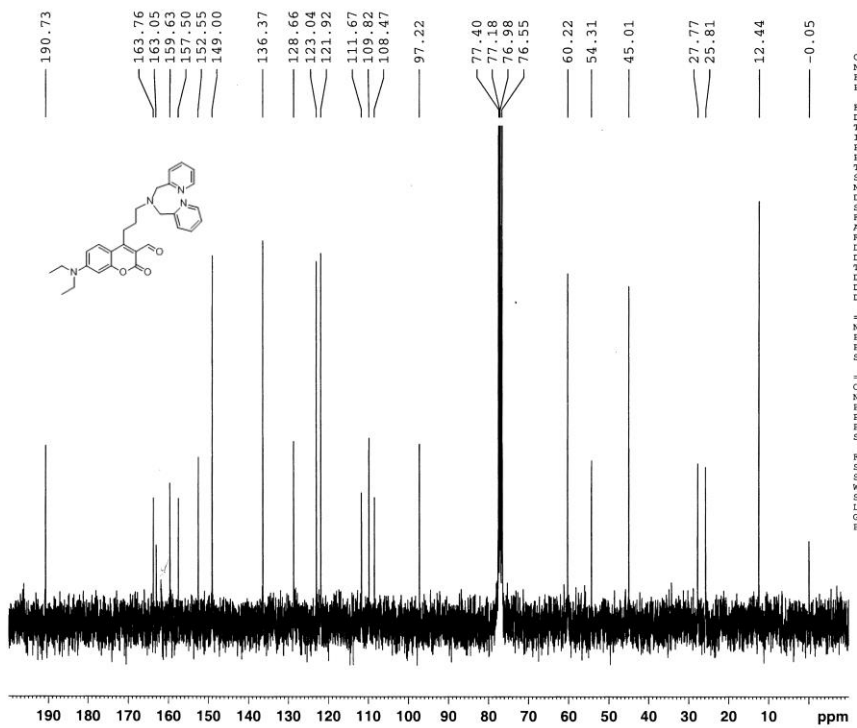

Supplement: c3ob41677a.pdf [file c3ob41677a.pdf]
